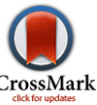

## Correction

# Correction: A Module of Human Peripheral Blood Mononuclear Cell Transcriptional Network Containing Primitive and Differentiation Markers Is Related to Specific Cardiovascular Health Variables

## The PLOS ONE Staff

There are two incorrect references to Table 2 in the Results section: the last sentence of the section “Cardiovascular functional validation of genes from Module 1” and the first sentence of the section “Personalized representation of gene analysis.” Both of these instances should refer to Table 3.

There is one incorrect reference to Table 3 in the Results section of the manuscript: the second sentence of “Modifications of PBMC gene expression in hypertensive patients” should refer to Table 2.

## Reference

1. Moldovan L, Anghelina M, Kantor T, Jones D, Ramadan E, et al. (2014) A Module of Human Peripheral Blood Mononuclear Cell Transcriptional Network Containing Primitive and Differentiation Markers Is Related to Specific Cardiovascular Health Variables. PLoS ONE 9(4): e95124. doi:10.1371/journal.pone.0095124

---

**Citation:** The PLOS ONE Staff (2014) Correction: A Module of Human Peripheral Blood Mononuclear Cell Transcriptional Network Containing Primitive and Differentiation Markers Is Related to Specific Cardiovascular Health Variables. PLoS ONE 9(7): e104595. doi:10.1371/journal.pone.0104595

**Published:** July 30, 2014

**Copyright:** © 2014 The PLOS ONE Staff. This is an open-access article distributed under the terms of the Creative Commons Attribution License, which permits unrestricted use, distribution, and reproduction in any medium, provided the original author and source are credited.
